# Supplementary material for: Betulinic acid is a PPARγ antagonist that improves glucose uptake, promotes osteogenesis and inhibits adipogenesis
Source: PubMed Central journal article supplement (PMC5516003; doi:10.1038/s41598-017-05666-6), 2017-07-18
Supplement: 41598_2017_5666_MOESM1_ESM.pdf [file 41598_2017_5666_MOESM1_ESM.pdf]

**Betulinic acid is a PPAR $\gamma$  antagonist that improves glucose uptake,  
promotes osteogenesis and inhibits adipogenesis**

Gloria Brusotti<sup>1</sup>, Roberta Montanari<sup>2</sup>, Davide Capelli<sup>2</sup>, Giulia Cattaneo<sup>1</sup>, Antonio Laghezza<sup>3</sup>, Paolo Tortorella<sup>3</sup>, Fulvio Loiodice<sup>3</sup>, Franck Peiretti<sup>4</sup>, Bernadette Bonardo<sup>4</sup>, Alessandro Paiardini<sup>5</sup>, Enrica Calleri<sup>1,\*</sup>, and Giorgio Pochetti<sup>2,\*</sup>

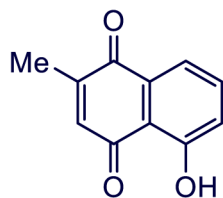

**Plumbagin**

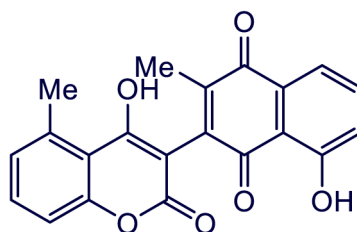

**Canaliculatin**

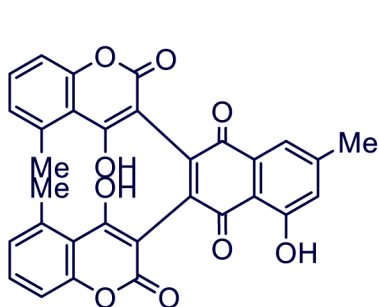

**Ismailin**

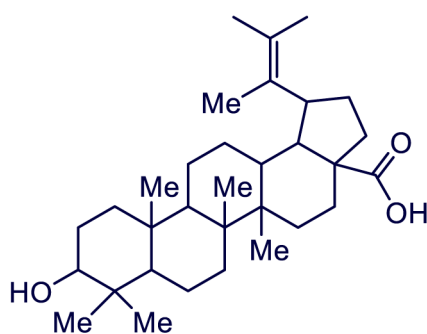

**Betulinic Acid**

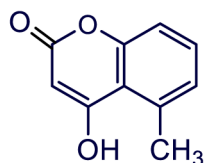

**4-hydroxy-5-methyl-coumarin**

**Supplementary Figure S1:** Structure of secondary metabolites contained in *Diospyros bipindensis*.

| Compound                                                                                                           | Acronym | Config. | PPAR $\gamma$         |                      |
|--------------------------------------------------------------------------------------------------------------------|---------|---------|-----------------------|----------------------|
|                                                                                                                    |         |         | EC <sub>50</sub> (nM) | E <sub>max</sub> (%) |
| 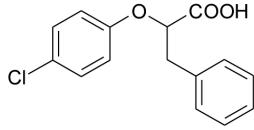<br>$C_{15}H_{13}ClO_3$<br>276.72 | (A)     | S       | 2700 $\pm$ 180        | 58 $\pm$ 6           |
| <br>$C_{17}H_{17}ClO_3$<br>304.78 | (B)     | S       | 320 $\pm$ 10          | 66 $\pm$ 4           |
| <br>$C_{21}H_{17}ClO_4$<br>368.82 | (C)     | S       | 26 $\pm$ 4            | 68 $\pm$ 6           |

**Supplementary Figure S2:** Three known ligands used as reference in the bioaffinity experiments.

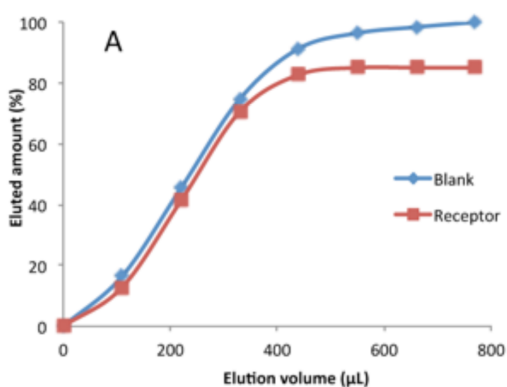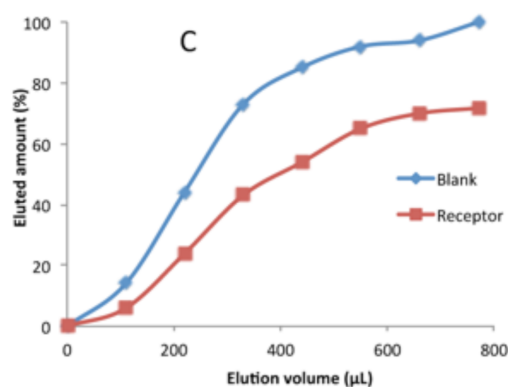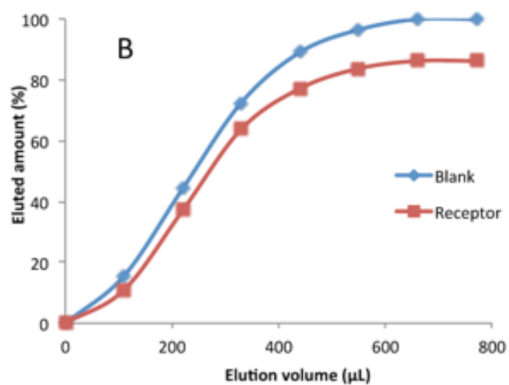

**D**

| $\Delta$ elution volume | Mix ( $\mu$ L) | Alone ( $\mu$ L) |
|-------------------------|----------------|------------------|
| A                       | 5              | 25               |
| B                       | 13             | 68               |
| C                       | 60             | 92               |

**Supplementary Figure S3:** The experimental breakthrough elution profiles for the three reference analytes.

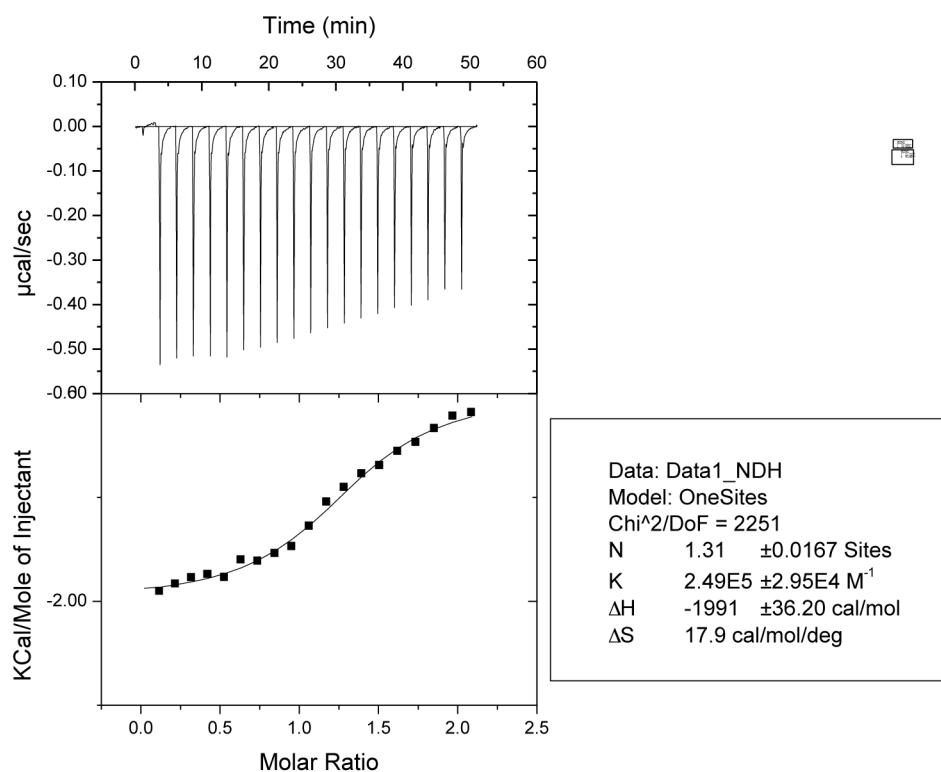

**Supplementary Figure S4:** Inverse titration of BA (50  $\mu\text{M}$ ) with PPAR $\gamma$  (500  $\mu\text{M}$ ). The upper panel shows the raw data; the lower panel shows the corresponding binding isotherm, fitted according to the “one binding site” model. The thermodynamic parameters ( $K_d$ ,  $\Delta$ H and  $\Delta$ S) are indicated in the box.

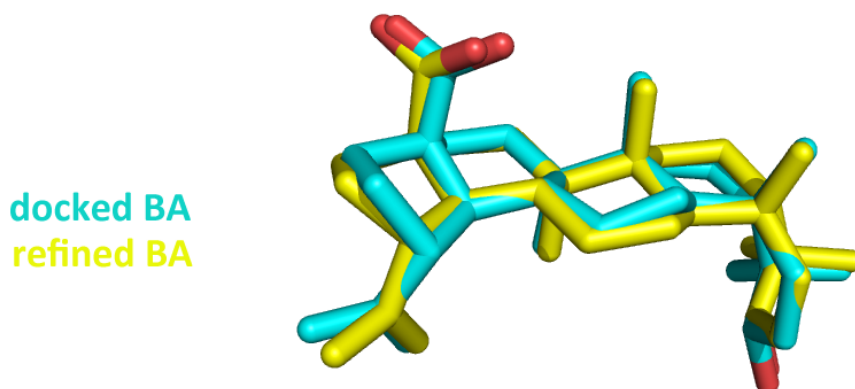

**Supplementary Figure S5:** Superposition of the docked ligand with the refined ligand in the primary site of PPAR $\gamma$  LBD.

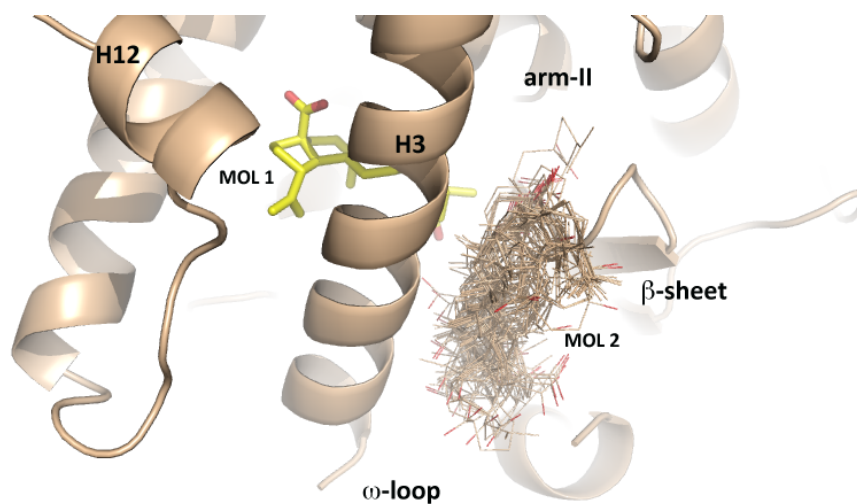

**Supplementary Figure S6:** Set of the energetically favourable poses of a second molecule of BA in the secondary site of PPAR $\gamma$  LBD.

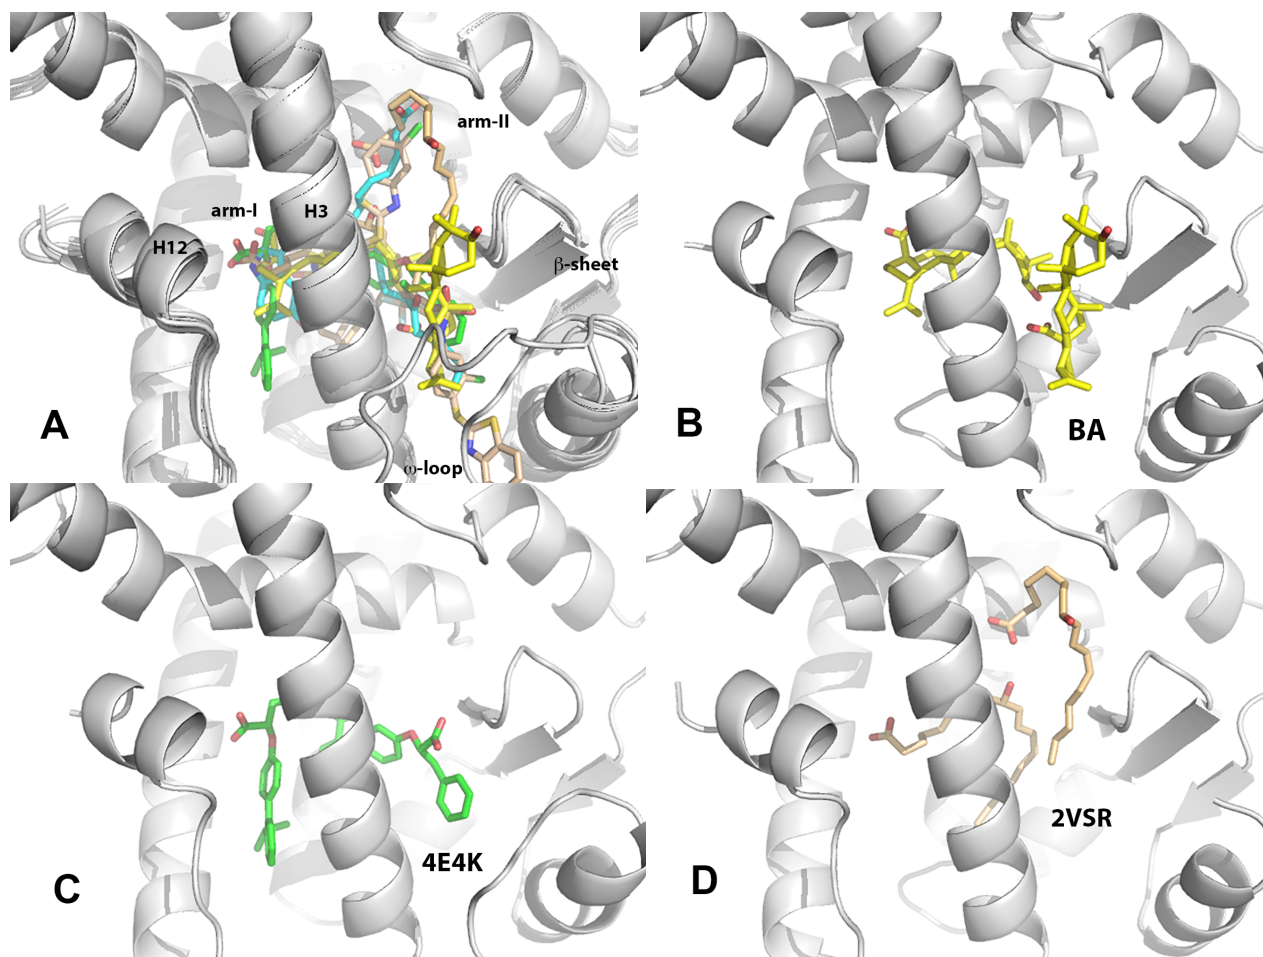

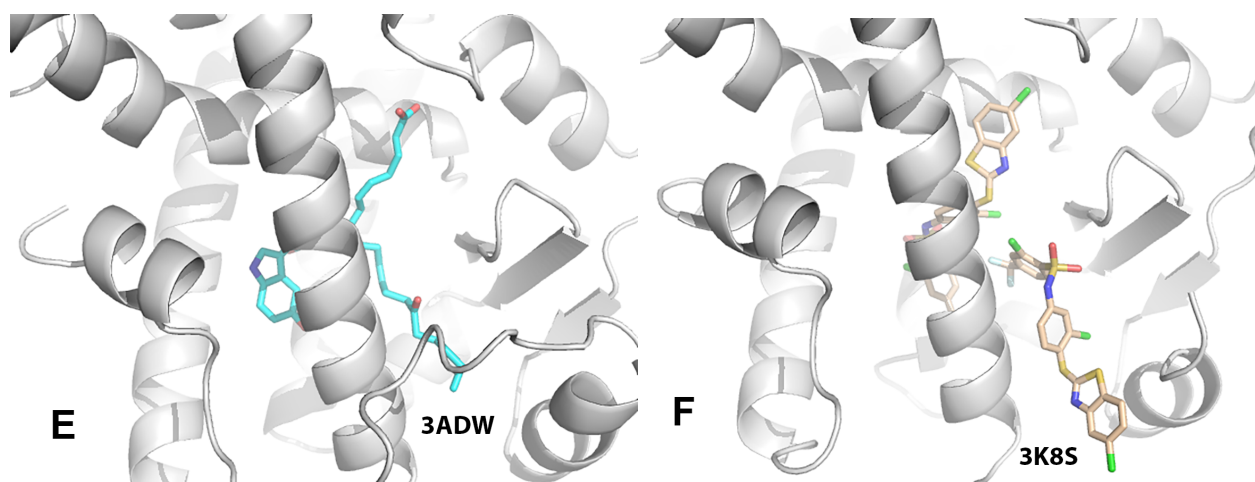

**Supplementary Figure S7:** Comparison among five pdb structures of PPAR $\gamma$  complexes with two simultaneously bound molecules: (A) superposition of the five ligands in the PPAR $\gamma$  LBD; PPAR $\gamma$  complexes with (B) betulinic acid, (C) 2-(Aryloxy)-3-phenylpropanoic acid JO21 (pdb 4E4K), (D) oxidised fatty acid 9-(S)-HODE (pdb 2VSR), (E) 5-methoxy-indole acetate and 15-oxo-eicosatetraenoic acid (pdb 3ADW) and (F) T2384 (pdb 3K8S).

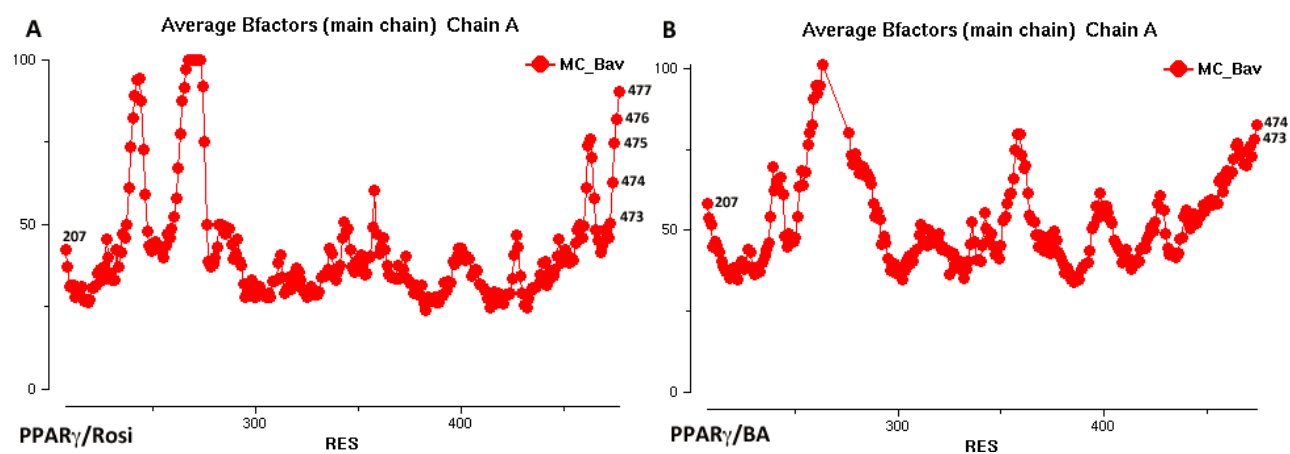

**Supplementary Figure S8:** Comparison of the helix12 B factors of the structure with the full agonist rosiglitazone (pdb code 2PRG) with those of PPAR $\gamma$ /BA.

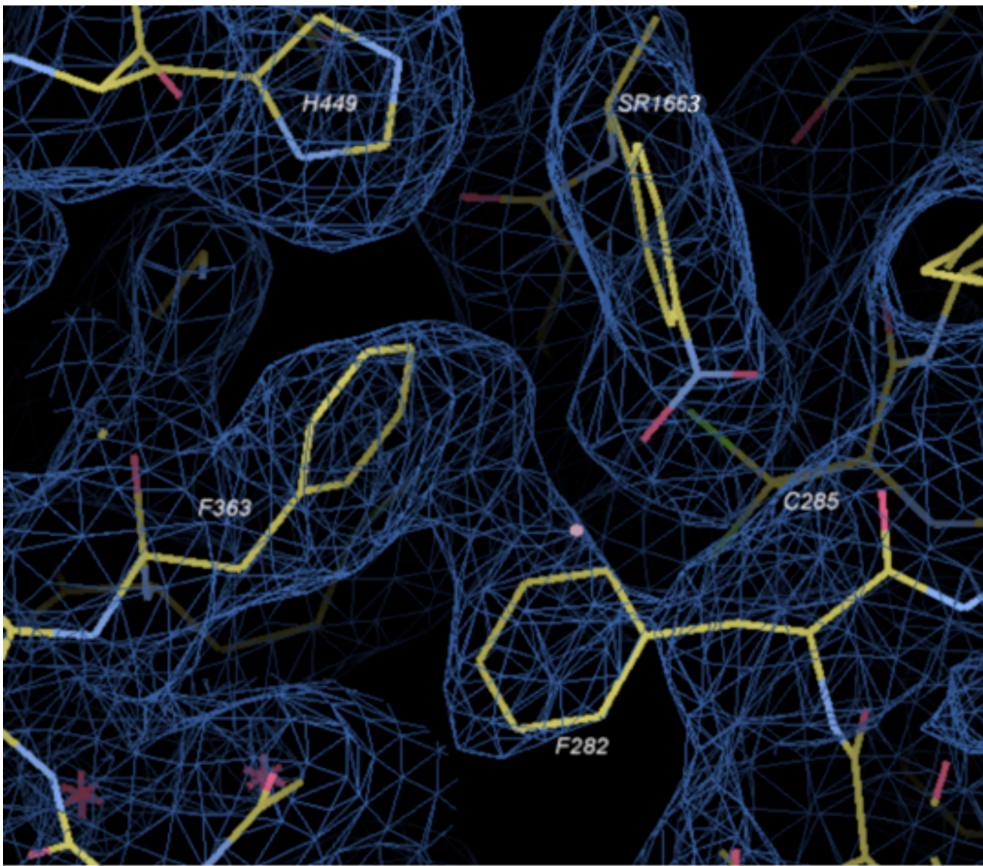

**Supplementary Figure S9:** 2Fo-Fc electron density maps reveals a possible different conformation of the F282 side-chain in the complex PPAR $\gamma$ /SR1663 (pdb 4R6S).
